# Supplementary material
Source: publisher site journal article supplement (https://www.dovepress.com/article/520532)
Supplement: Supplementary file 1 [file Additional%20file%20_1-revised_1.docx]

**Additional file**

| **Table S1 Primer sequences** | | |
| --- | --- | --- |
| **Gene name** | **Forward primer (5'-3')** | **Reverse primer (5'-3')** |
| β-actin | CACCATTGGCAATGAGCGGTTC | AGGTCTTTGCGGATGTCCACGT |
| ALKBH5 | CGGCGAAGGCTACACTTACG | CCACCAGCTTTTGGATCACCA |
| NANOG | TTTGTGGGCCTGAAGAAAACT | AGGGCTGTCCTGAATAAGCAG |
| EPCAM | AATCGTCAATGCCAGTGTACTT | TCTCATCGCAGTCAGGATCATAA |
| CK19 | ATGGCCGAGCAGAACCGGAA | CCATGAGCCGCTGGTACTCC |
| CTNNB1 | CATCTACACAGTTTGATGCTGCT | GCAGTTTTGTCAGTTCAGGGA |

**Supplementary figure**


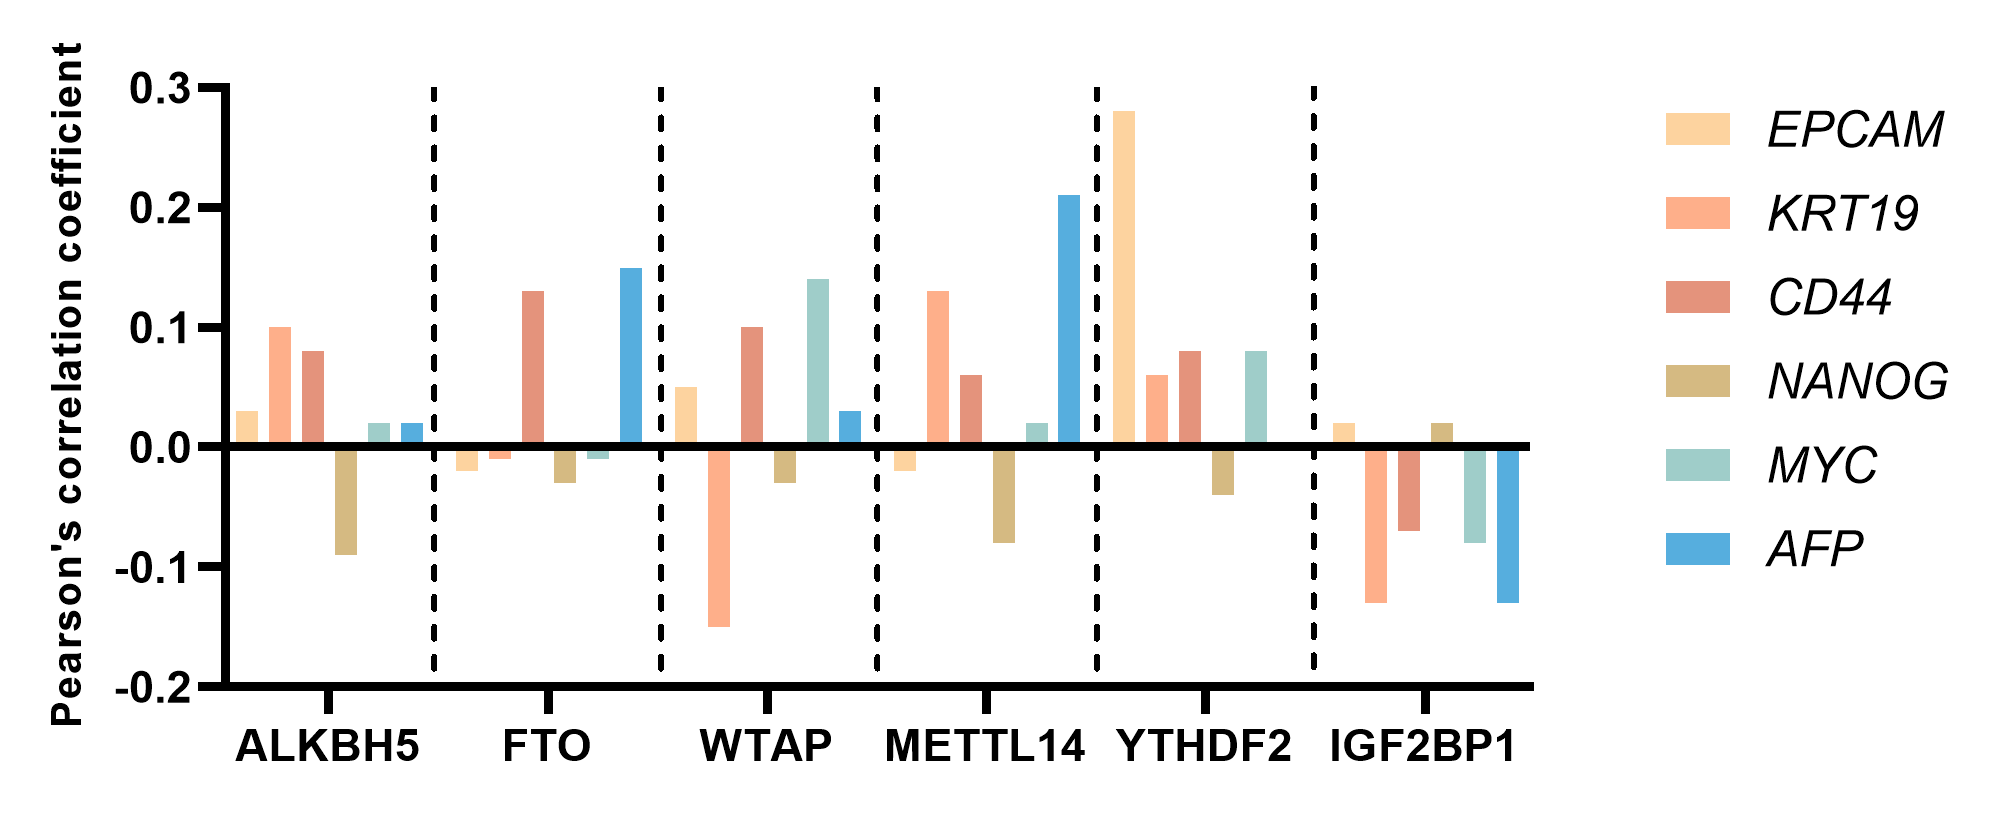


**Supplementary figure 1 Correlation between m6A enzymes gene and stemness-associated genes**

The histogram displays Pearson correlation coefficients between m6A modification enzymes (*ALKBH5*, *FTO*, *WTAP*, *METTL14*, *YTHDF2*, *IGF2BP1*) and stemness-related genes (*EPCAM*, *KRT19*, *CD44*, *NANOG*, *MYC*, *AFP*), which was analyzed by the Breast Cancer Gene-Expression Miner v5.1 database.


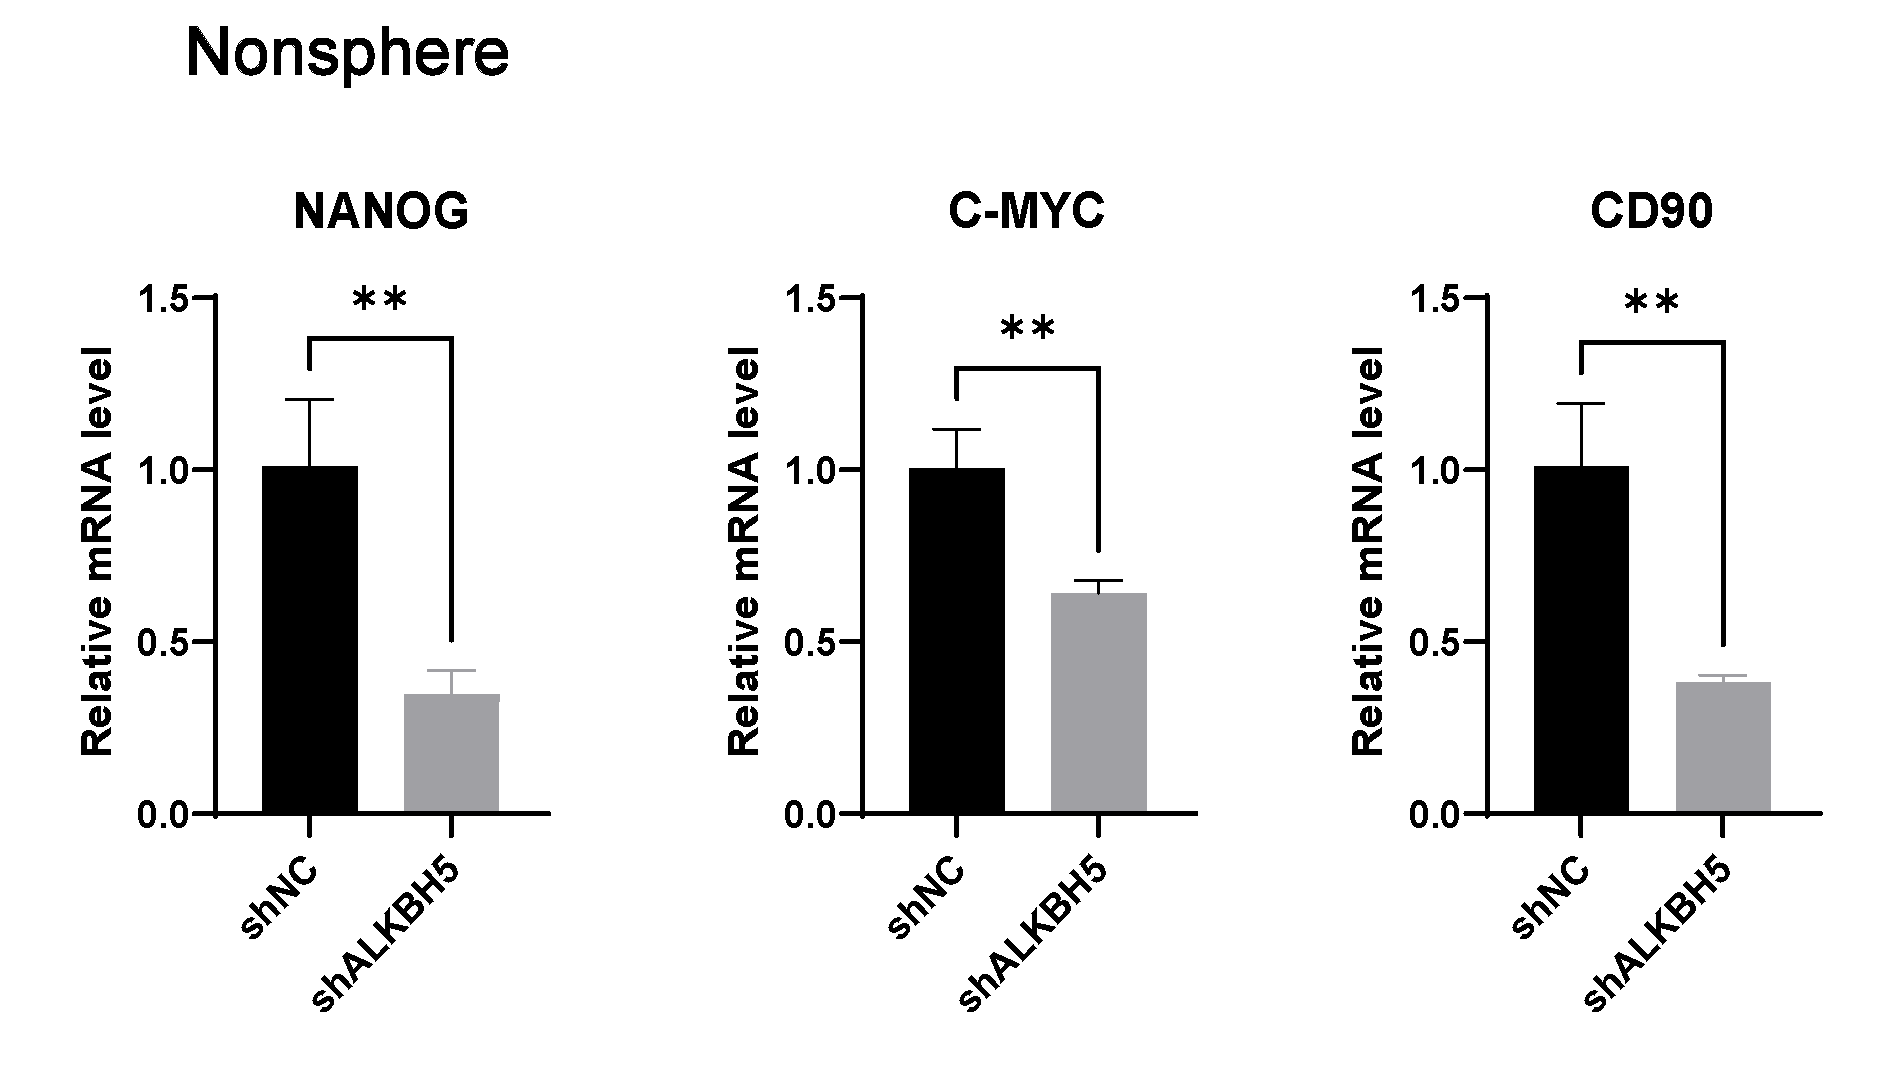


**Supplementary figure 2 ALKBH5 knockdown attenuates stemness related gene expression.**

The relative mRNA level of stemness related gene (*NANOG*, *C-MYC*, and *CD90*) in nonsphere MCF-7 cells under ALKBH5 inhibition. Statistical significance was determined using two-tailed T-test, with p<0.05 considered significant. **P<0.01.

**
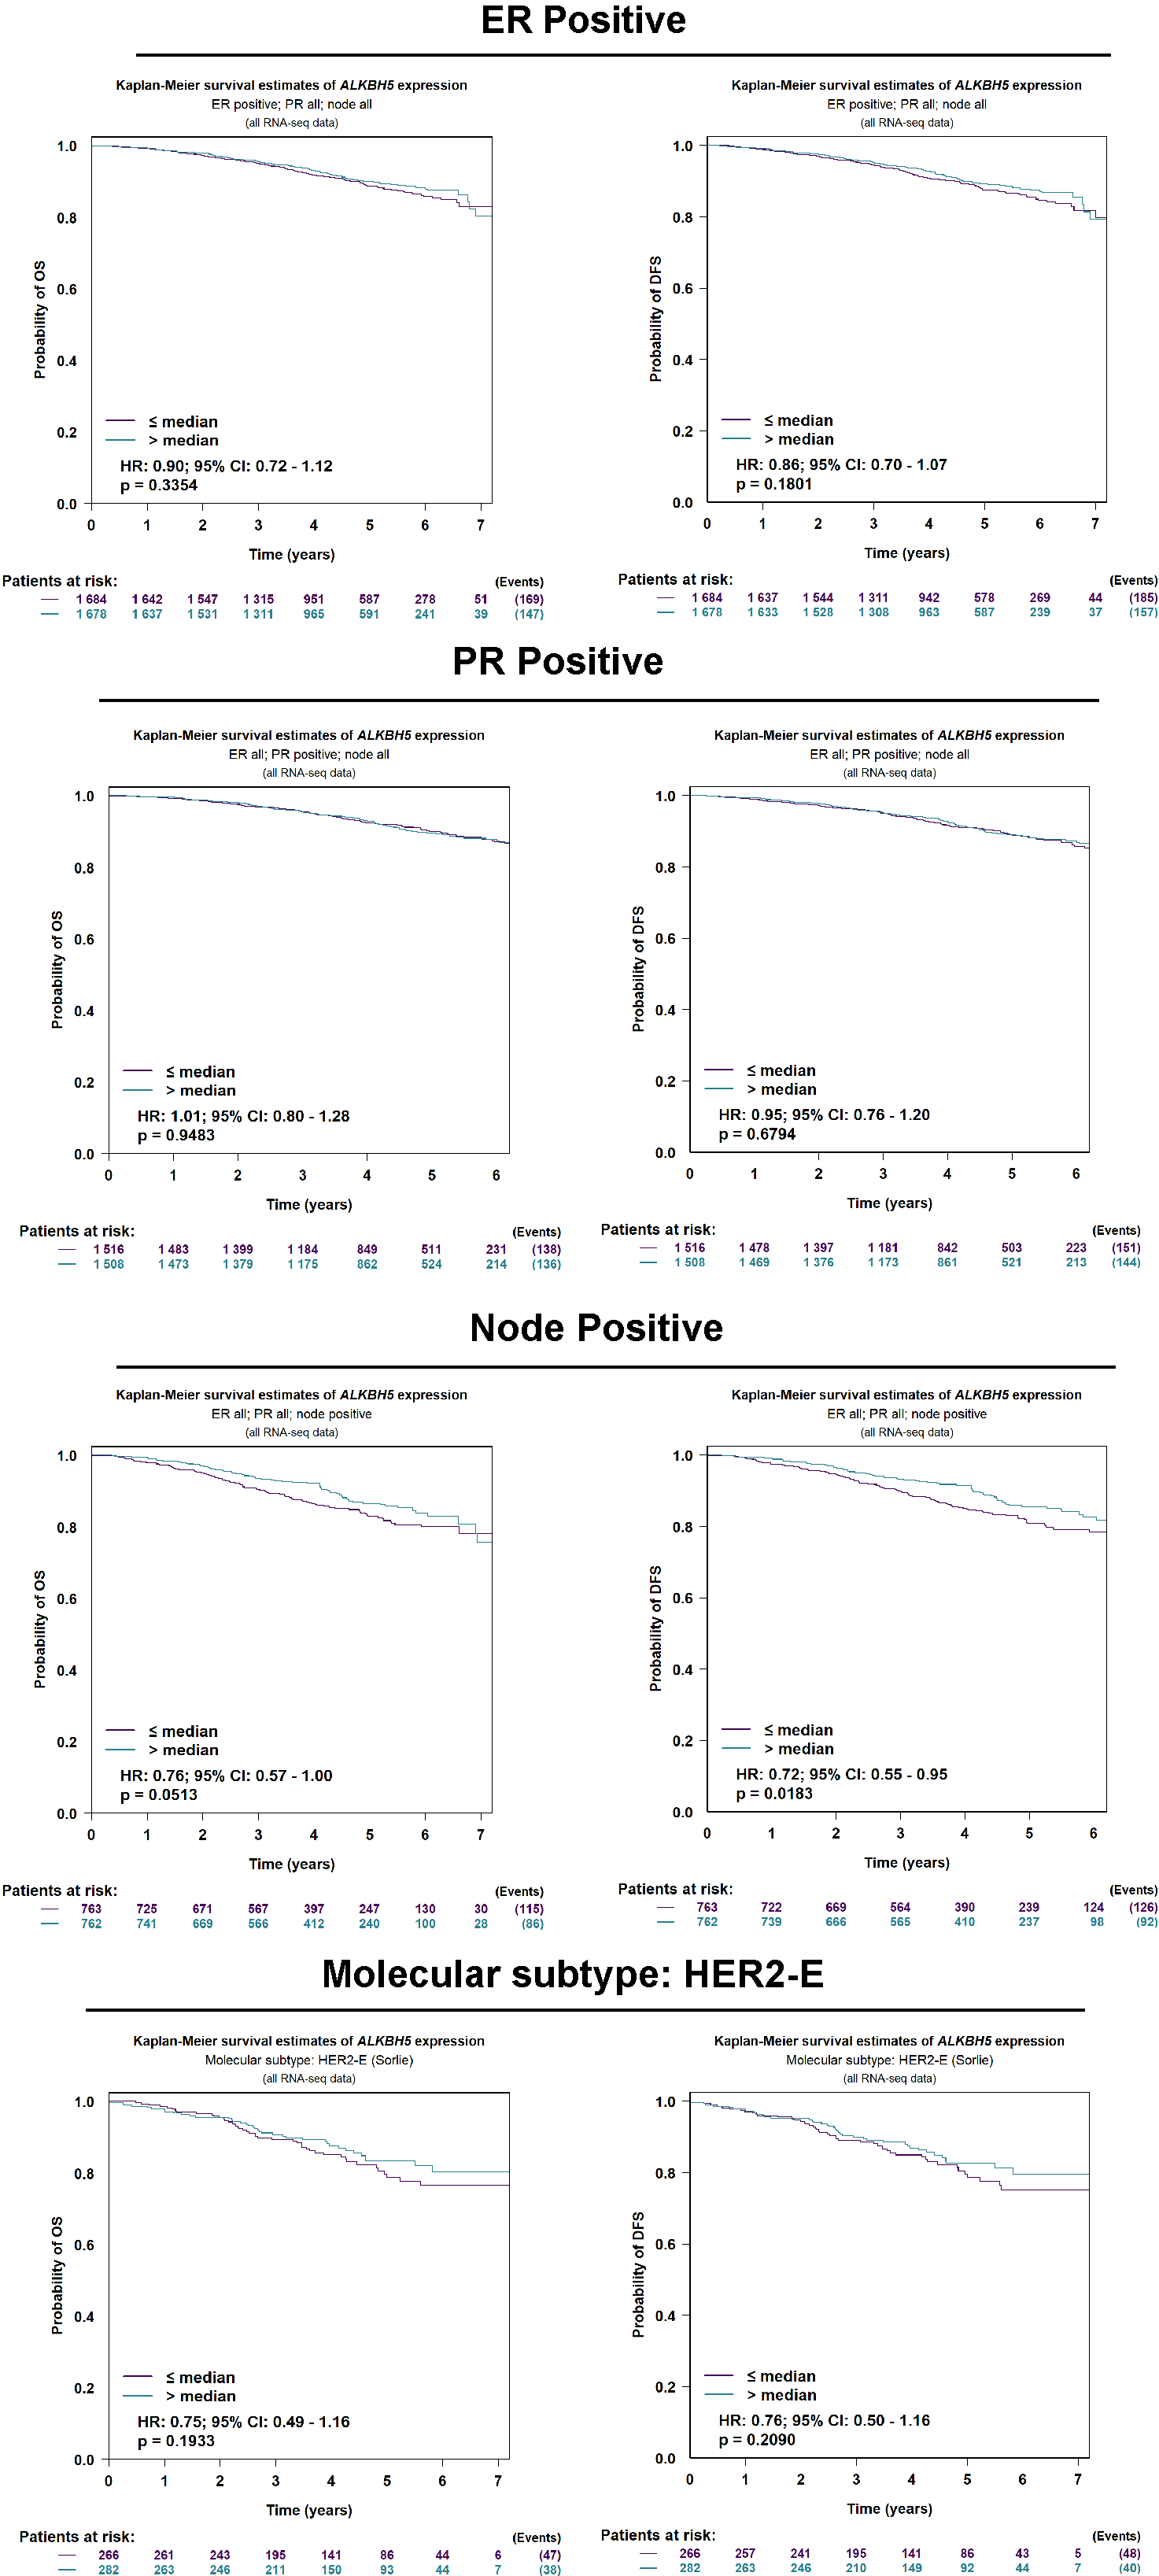
**

**Supplementary figure 3 Kaplan-Meier survival analysis of ALKBH5 in different subtypes of breast cancer patients.**

Kaplan-Meier survival analysis of overall survival (OS) and disease-free survival (DFS) by Breast Cancer Gene-Expression Miner v5.1 platform.
